# Supplementary material for: Fabrication and Characterization of Hydrophobic Porous Metallic Membranes for High Temperature Applications
Source: MDPI journal article supplement (doi:10.3390/pr9050809), 2021-05-05
Supplement: s1 [file s1]

# Supplementary Materials: Fabrication and Characterization of Hydrophobic Porous Metallic Membranes for High Temperature Applications

Sara Claramunt \*, Muhammad Khurram, Walther Benzinger, Manfred Kraut and Roland Dittmeyer

Institute for Micro Process Engineering (IMVT), Karlsruhe Institute of Technology,  
76344 Eggenstein-Leopoldshafen, Germany; muhammadkhurram56@gmail.com (M.K.);  
walther.benzinger@kit.edu (W.B.); manfred.kraut@kit.edu (M.K.); roland.dittmeyer@kit.edu (R.D.)

\* Correspondence: sara.claramunt@kit.edu; Tel.: +49-721-608-24052

## EDS and WDS Analyses

**Table S1.** Average EDS Results for the Si-DLC layer on a porous SS substrate. Probe positions see Figure S 1.

| Substrate material  | C / wt% | O / wt% | F / wt% | Si / wt% |
|---------------------|---------|---------|---------|----------|
| Homogeneous coating | 51.11   | 24.54   | -       | 24.34    |

For the quantitative characterization of the fluor-containing coating (FAS) by means of EDS analysis, the results on the FAS coated silicon wafer are shown, to avoid the overlapping of the Fe and F peaks, when analysing a SS probe.

**Table S2.** Exemplary EDS results for an FAS coated silicon wafer (including substrate). Probe positions see Figure S 1.

| Substrate material               | C / wt% | O / wt% | F / wt% | Si / wt% |
|----------------------------------|---------|---------|---------|----------|
| FAS coated [002]                 | 1.63    | 0.28    | 0.21    | 97.88    |
| FAS coated (agglomeration) [001] | 7.20    | 0.76    | 1.45    | 90.59    |

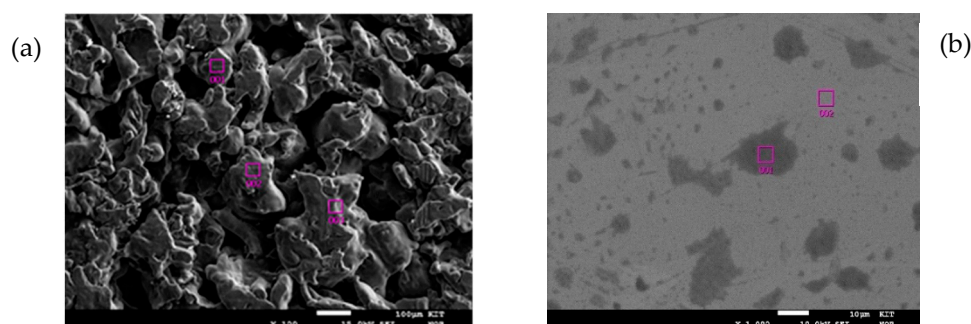

**Figure S1.** Probe positions marked for EDS analysis of (a) Si-DLC layer on a porous SS substrate; (b) FAS coated silicon wafer (including substrate).

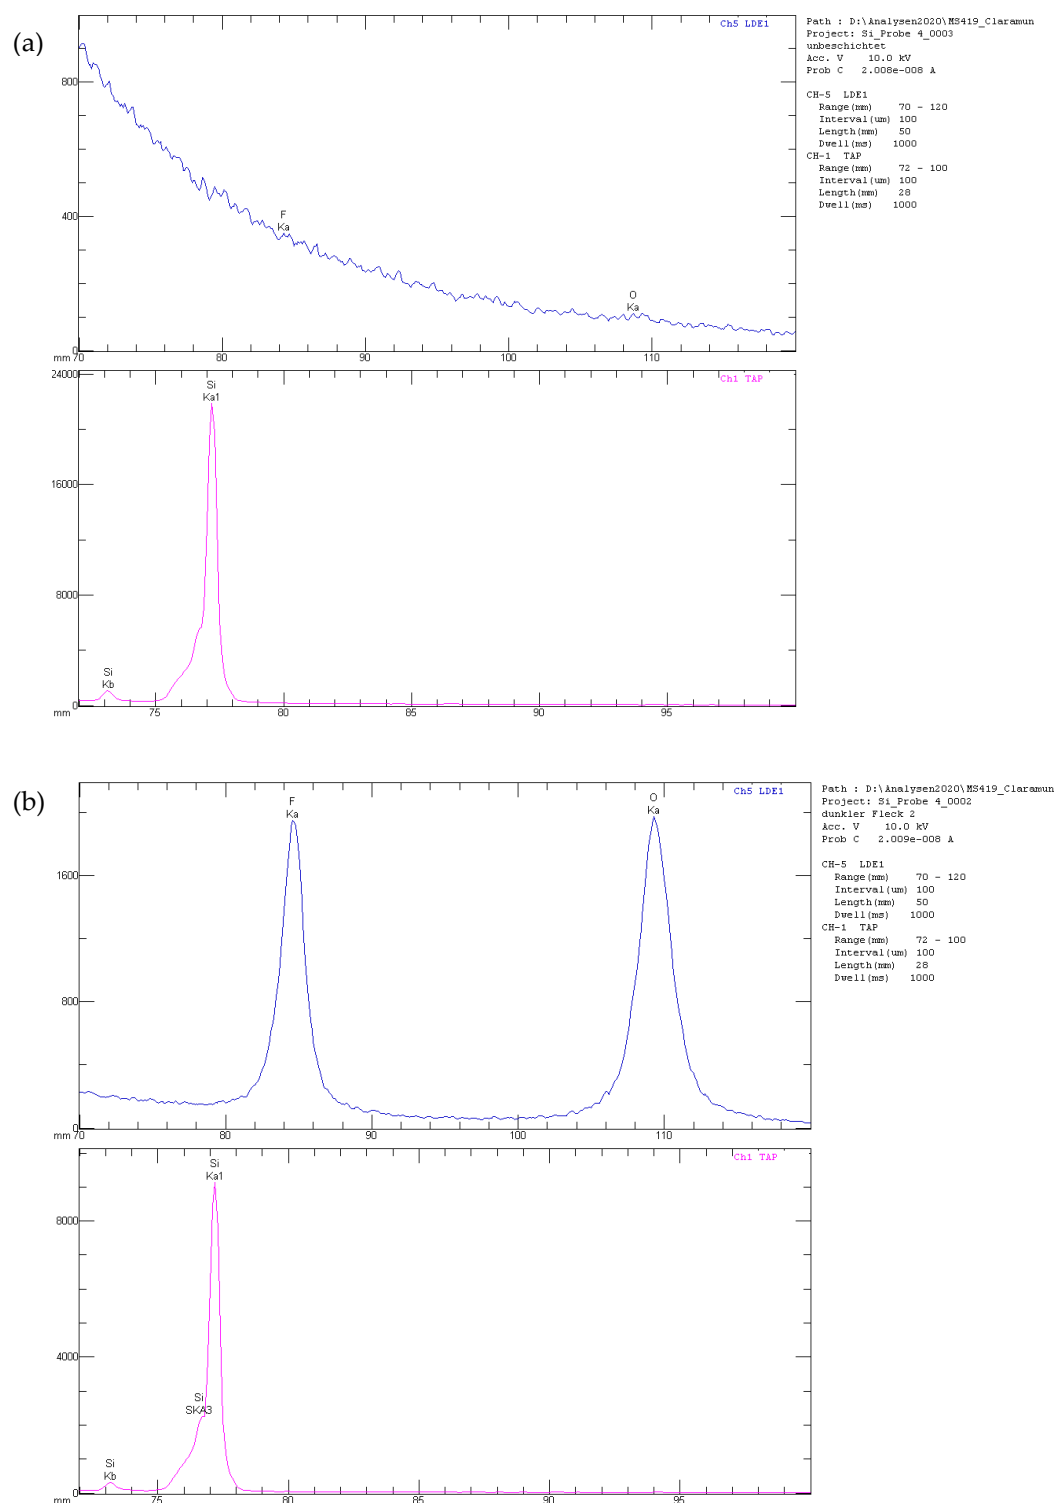

**Figure S2.** WDS analysis of (a) uncoated silicon wafer, showing the absence of O and F (no peaks); (b) FAS coated silicon wafer, showing the presence of Si, O and F in the layer, corresponding to Figure S 1.

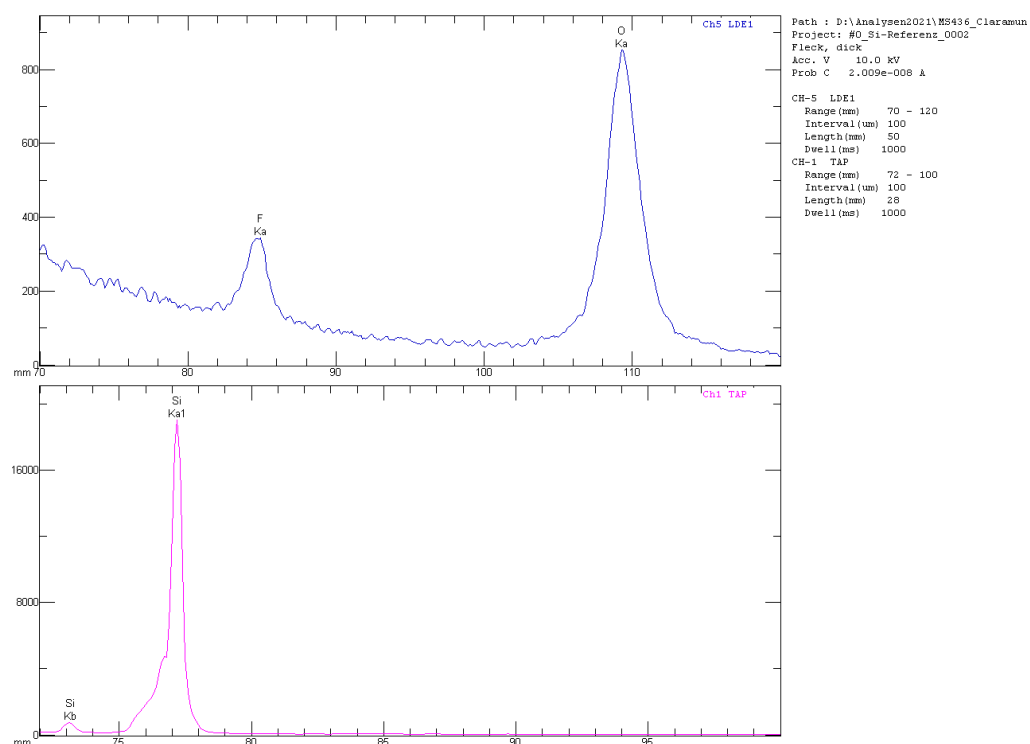

**Figure S3.** WDS Analysis of the FAS coated silicon wafer after 350°C heating stage, corresponding to sample in Figure S 4.

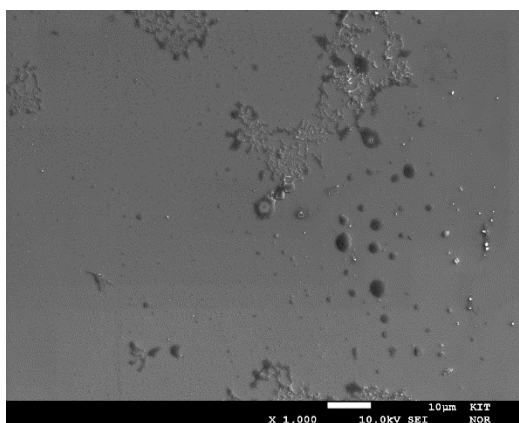

**Figure S4.** SEM Picture of the FAS coated silicon wafer after 350°C heating stage.

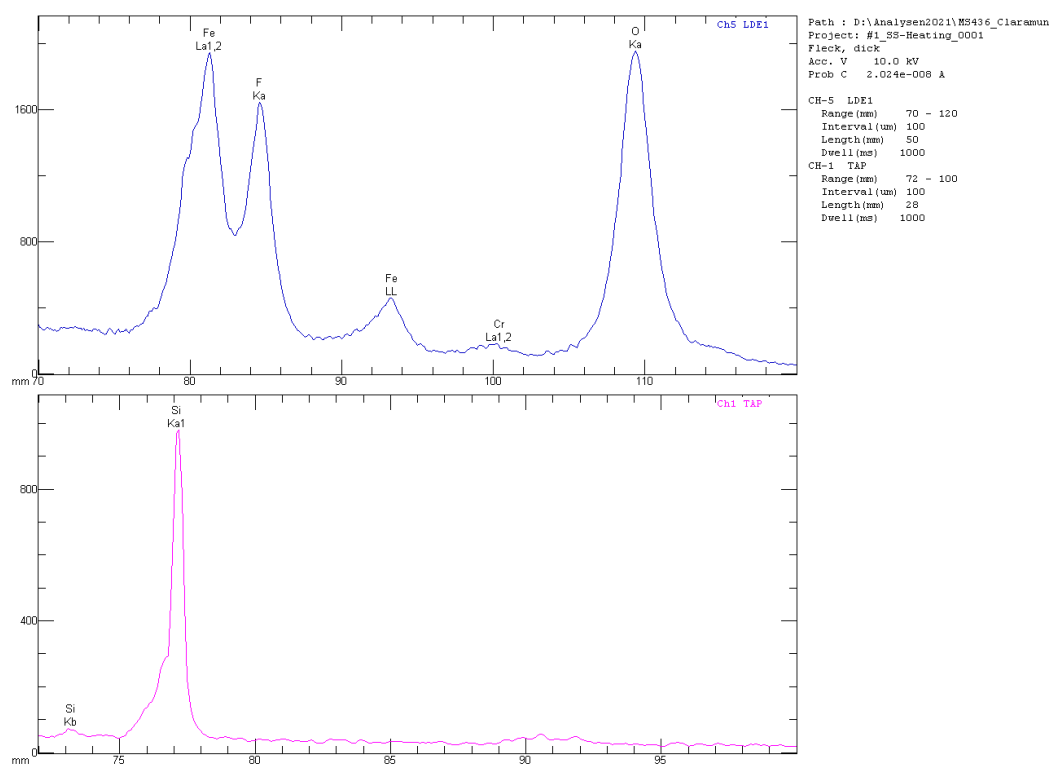

**Figure S5.** WDS Analysis of the FAS coated flat SS substrate after the 280°C heating stage corresponding to the sample of Figure S 6, showing still qualitatively the presence of the layer elements.

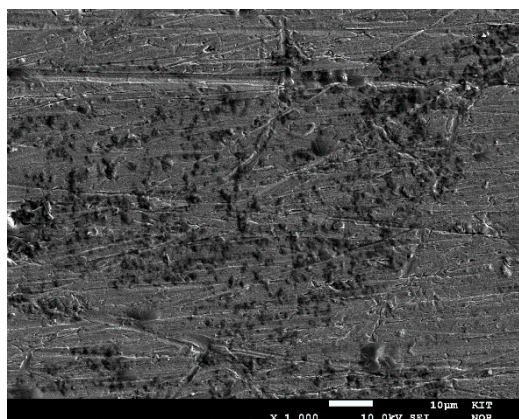

**Figure S6.** SEM Picture of the FAS coated flat SS substrate after the 280°C heating stage.

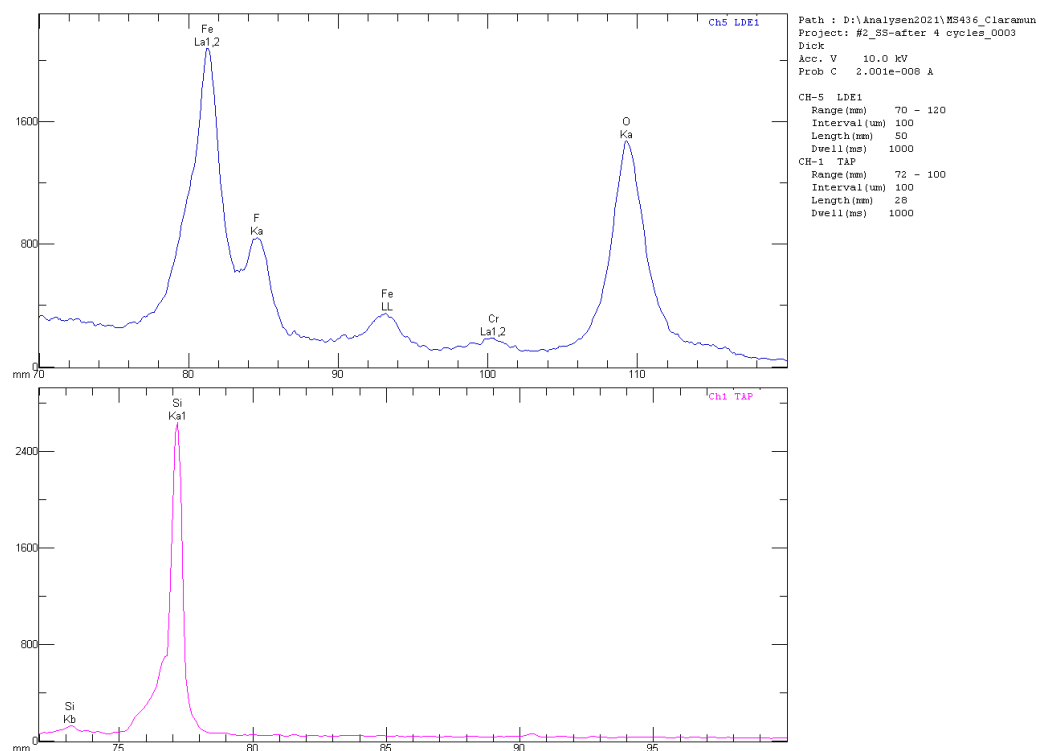

**Figure S7.** WDS Analysis of the FAS coated flat SS substrate after 4 heating cycles at 250°C corresponding to the sample of Figure S 8, showing the presence of the layer elements.

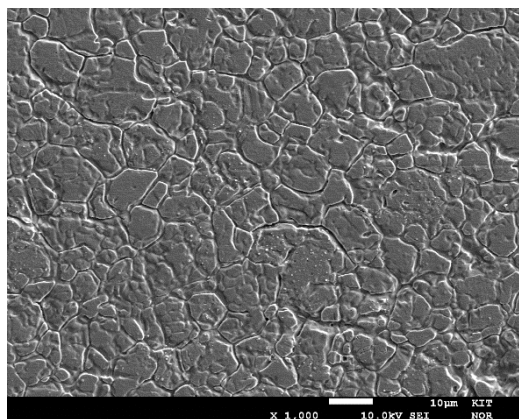

**Figure S8.** SEM Picture of the FAS coated flat SS substrate after 4 heating cycles at 250°C.

### Surface roughness analysis

**Table S3.** Average 3D surface texture parameters according to ISO 25178[34], performed with confocal microscopy

| Substrate                 | Sa / $\mu\text{m}$ | Sq / $\mu\text{m}$ | Sz / $\mu\text{m}$ |
|---------------------------|--------------------|--------------------|--------------------|
| non-coated SS flat        | 9.8314             | 11.762             | 113.38             |
| non-coated SS fine porous | 11.154             | 13.733             | 122.44             |

Sa=arithmetical mean height of the surface; Sq=root mean square height of the surface; Sz=maximum height of the surface

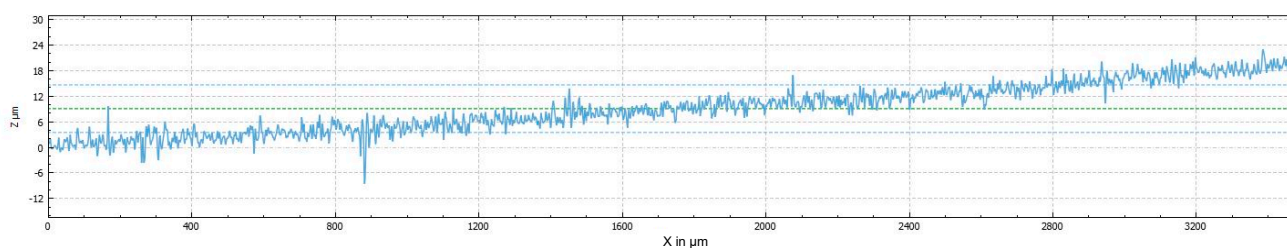

**Figure S9.** Exemplary surface height profile of the flat SS substrate (non-coated)

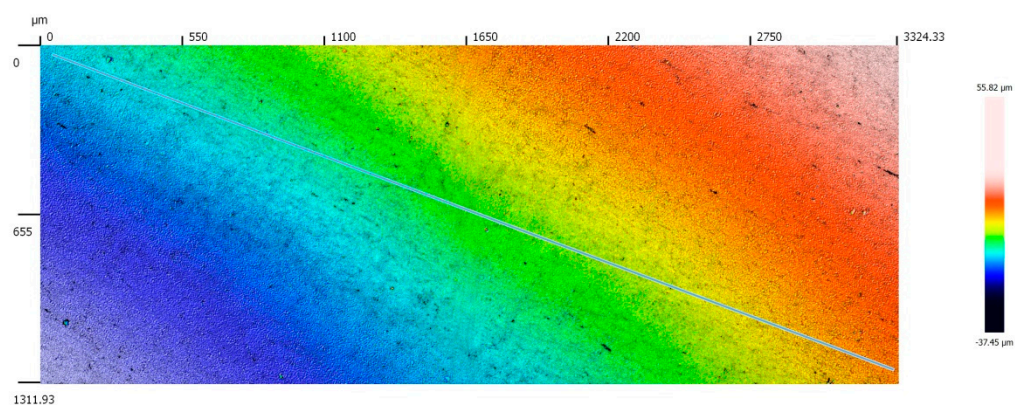

**Figure S10.** Confocal image of a flat SS substrate (non-coated) corresponding to the height profile in Figure S9

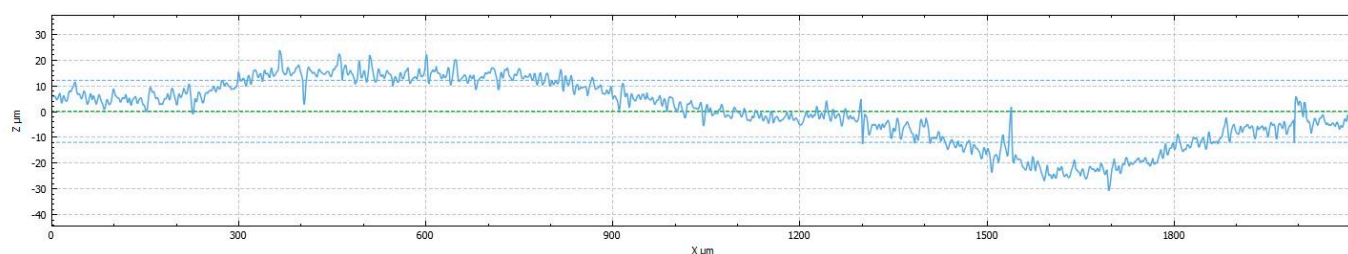

**Figure S11.** Exemplary surface height profile of the fine porous SS substrate (non-coated)

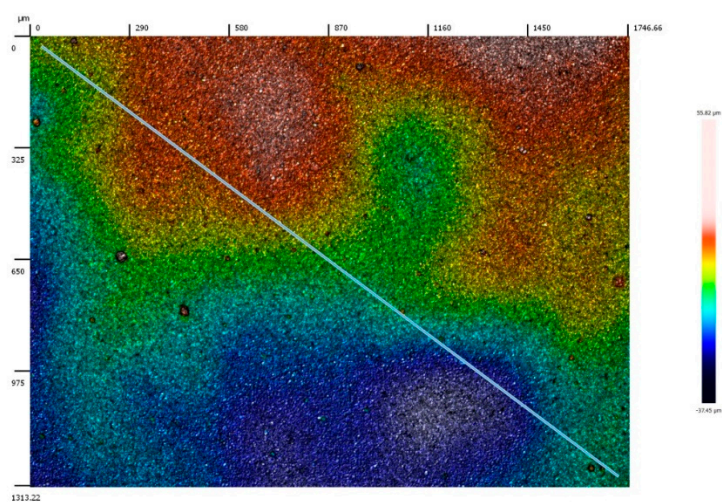

**Figure S12.** Confocal image of a fine porous SS substrate (non-coated) corresponding to the height profile in Figure S 11
